1 **LxxIxE-like Motif in Spike Protein of SARS-CoV-2 that is Known to Recruit the Host**  
2 **PP2A-B56 Phosphatase Mimics Artepillin C, an Immunomodulator, of Brazilian Green**  
3 **Propolis**

4

5 Halim Maaroufi

6 Institut de biologie intégrative et des systèmes (IBIS). Université Laval. Québec, Canada.

7 [Halim.maaroufi@ibis.ulaval.ca](mailto:Halim.maaroufi@ibis.ulaval.ca)

8

9 **ABSTRACT**

10 SARS-CoV-2 is highly contagious and can cause acute respiratory distress syndrome (ARDS) and  
11 multiple organ failure that are largely attributed to the cytokine storm. The surface coronavirus  
12 spike (S) glycoprotein is considered as a key factor in host specificity because it mediates infection  
13 by receptor-recognition and membrane fusion. Here, the analysis of SARS-CoV-2 S protein  
14 revealed two B56-binding LxxIxE-like motifs in S1 and S2 subunits that could recruit the host  
15 protein phosphatase 2A (PP2A). The motif in S1 subunit is absent in SARS-CoV and MERS-CoV.  
16 Phosphatases and kinases are major players in the regulation of pro-inflammatory responses during  
17 pathogenic infections. Moreover, studies have shown that viruses target PP2A in order to  
18 manipulate host's antiviral responses. Recent researches have indicated that SARS-CoV-2 is  
19 involved in sustained host inflammation. Therefore, by controlling acute inflammation, it is  
20 possible to eliminate its dangerous effects on the host. Among efforts to fight COVID-19, the  
21 interaction between LxxIxE-like motif and the PP2A-B56-binding pocket could be a target for the  
22 discovery and/or development of a bioactive ligand inhibitor for therapeutic purposes. Indeed, a  
23 small molecule called Artepillin C (ArtC), a main compound in Brazilian honeybee green propolis,  
24 mimics the side chains of LxxLxE motif. Importantly, ArtC is known, among other effects, to have  
25 anti-inflammatory activity that makes it an excellent candidate for future clinical trials in COVID-  
26 19 patients.

27

28 **KEYWORDS** SARS-CoV-2; spike glycoprotein; PP2A-B56 phosphatase; LxxIxE-like motif;  
29 anti-inflammation; Artepillin C.

## 30 INTRODUCTION

31  
32 In March 11<sup>th</sup> 2020, the World Health Organization (WHO) announced that COVID-19  
33 (Coronavirus Disease-2019) situation is a pandemic. The novel SARS-CoV-2 has had serious  
34 consequences for human health and socioeconomic stability worldwide. Coronaviruses (CoVs) are  
35 a large family of enveloped single positive-stranded RNA viruses that can infect both mammalian  
36 and avian species because their rapid mutation and recombination facilitate their adaptation to new  
37 hosts (Graham and Baric, 2010; Li, 2013). They can cause severe, often fatal Acute Respiratory  
38 Distress Syndrome (ARDS). CoVs are classified into *Alpha*-, *Beta*-, *Gamma*-, and  
39 *Deltacoronavirus* genetic genera. The novel betacoronavirus (betaCoVs) SARS-CoV-2 is  
40 relatively close to other betaCoVs: severe acute respiratory syndrome coronavirus (SARS-CoV),  
41 Middle East respiratory syndrome coronavirus (MERS-CoV), bat coronavirus HKU4, mouse  
42 hepatitis coronavirus (MHV), bovine coronavirus (BCoV), and human OC43 coronavirus (HCoV-  
43 OC43). SARS-CoV emerged in China (2002–2003) and spread to other countries (more than 8,000  
44 infection cases and a fatality rate of ~10%) (Peiris et al., 2003). In 2012, MERS-CoV was detected  
45 in the Middle East. It spread to multiple countries, infecting more than 1,700 people with a fatality  
46 rate of ~36% (de Wit et al., 2016).

47  
48 The surface-located SARS-CoV-2 spike glycoprotein S (S) is a 1273 amino acid residues. It is a  
49 homotrimeric, multidomain, and integral membrane protein that give coronaviruses the appearance  
50 of having crowns (*Corona* in Latin) (Li, 2016). It is a key piece of viral host recognition (receptor-  
51 recognition) and organ tropism and induces strongly the host immune reaction (Li, 2015). It is  
52 subdivided to S1 subunit that binds to a receptor on the host cell surface and S2 subunit that permits  
53 viral and host membranes fusion. S1 subunit is divided into two domains, an N-terminal domain  
54 (NTD) and a C-terminal receptor-binding domain (RBD) that can function as viral receptors-  
55 binding (Li, 2012). In addition, S1 subunit is normally more variable in sequence among different  
56 CoVs than is the S2 subunit (Masters, 2006).

57  
58 Protein phosphatase 2A (PP2A) is a major family of Serine/Threonine phosphatases in eukaryotic  
59 cells and regulates diverse biological processes through dephosphorylation of numerous signaling  
60 molecules. PPA2 and phosphatase 1 (PP1), regulates over 90% of all Ser/Thr dephosphorylation

61 events in eukaryotic cells (Eichhorn et al., 2009). PP2A is a heterotrimeric holoenzyme composed  
62 of a stable heterodimer of the scaffold A-subunit (PP2A-A) and catalytic C-subunit (PP2A-C) and  
63 a variable mutually exclusive regulatory subunit from four families (B (B55), B' (B56), B'' and B''')  
64 which provide substrate specificity. The human B56 family consists of at least five different  
65 members ( $\alpha$ ,  $\beta$ ,  $\gamma$ ,  $\delta$  and  $\epsilon$ ). Phosphatases and kinases are big players in the regulation of pro-  
66 inflammatory responses during microbial infections. Sun et al. (2017) showed that PP2A plays an  
67 important role in regulating inflammation by controlling the production of inflammatory  
68 cytokines/chemokines (Kozicky and Sly, 2015). In addition, PP2A is one of the phosphatases  
69 involved in negatively regulating the inflammatory response (Shanley et al., 2001). Moreover,  
70 studies have revealed that viruses use multiple strategies to target PP2A in the aim to manipulate  
71 host antiviral responses (Guergnon et al., 2011).

72  
73 Artepillin C (ArtC) is uniquely found in Brazilian honeybee green propolis and is one of its major  
74 bioactive components (Marcucci et al., 2001; Park et al., 2004). It is a low-molecular weight  
75 phenolic single ring with two prenyl groups (3,5-diprenyl-4-hydroxycinnamic acid) (Szliszka et  
76 al., 2013). These properties suggest high oral bioavailability and cell-permeability allowing good  
77 biological activity of ArtC (Shimizu et al., 2004; Konishi et al. 2005; Konishi, 2005). Indeed,  
78 Paulino et al. (2008) showed that ArtC exhibited bioavailability by oral administration in mice.  
79 Interestingly, ArtC has many therapeutic effects, anti-microbial, anti-tumor, apoptosis-inductor,  
80 immunomodulatory, and anti-oxidant effects (Salomão et al., 2004; Kimoto et al., 2001; Orsolich et  
81 al., 2006; Matsuno et al., 1997; Gekker et al., 2005; Nakanishi et al., 2003). Many of these  
82 therapeutic effects can be attributed to its immunomodulatory functions (Chan et al., 2013; Cheung  
83 et al., 2011; Paulino, et al., 2008). Indeed, Szliszka et al., (2013) have tested the anti-inflammatory  
84 activity of ArtC in activated RAW264.7 macrophages. They found that ArtC exerted strong  
85 antioxidant activity and significantly inhibited the production of several pro-inflammatory  
86 cytokines, such as TNF- $\alpha$ , IL-1 $\beta$  and IL-12, which makes ArtC an excellent anti-inflammatory  
87 drug. In addition, ArtC suppresses T cell proliferation and activation (Chan et al., 2013). Here, S  
88 protein was analyzed because of its importance in mediating infection. This analysis revealed two  
89 B56-binding LxxIx $\beta$ E-like motifs in S1 and S2 subunits that could recruit the host PP2A.  
90 Interestingly, side chains of LxxLxE motif present similarity with a small molecule called  
91 Artepillin C (ArtC), a main compound in Brazilian honeybee green propolis. Moreover, ArtC has

92 anti-inflammatory activity that makes it an excellent candidate for future clinical trials in COVID-  
93 19 patients.

94

## 95 **RESULTS AND DISCUSSION**

96

### 97 *Two LxxIxE-like motifs in S1 and S2 subunits of Spike protein*

98

99 Sequence analysis of SARS-CoV-2 spike protein by the eukaryotic linear motif (ELM) resource  
100 (<http://elm.eu.org/>) revealed short linear motifs (SLiMs) known as LxxIxE-like motif  
101 ,<sup>293</sup>LDPLSE<sup>298</sup> in S1 subunit and <sup>1197</sup>LIDLQE<sup>1202</sup> in S2 subunit (Fig. 1). SLiMs are few amino  
102 acid residues (3-15) in proteins that facilitate protein sequence modifications and protein-protein  
103 interactions (Davey et al., 2012; Van Roey et al., 2014). RNA viruses are known to mutate quickly  
104 and thus are able to create mimic motifs, on very short time scales, that could hijack biological  
105 processes in the host cell such as cell signaling networks (Davey et al., 2015; Via et al., 2015;  
106 Davey et al., 2011). Interestingly, <sup>293</sup>LDPLSE<sup>298</sup> is only present in SARS-CoV-2 and absent in S  
107 protein of coronaviruses analysed in this study (Fig. 1A). In order to interact with protein(s),  
108 <sup>293</sup>LDPLSE<sup>298</sup> must be present at the surface of S1 subunit. Indeed, this motif is exposed in the  
109 surface of S1 subunit in the end of NTD (Fig. 3B). A second motif <sup>1197</sup>LIDLQE<sup>1202</sup> is present in S2  
110 subunit and conserved in SARS-CoV-2, SARS-CoV, SARS-like of bat from China and Kenya (Fig.  
111 1B). These last betacoronaviruses are phylogenetically close (Fig. 2). Unfortunately, the region  
112 containing <sup>1197</sup>LIDLQE<sup>1202</sup> peptide has not been resolved in all known 3D structures of S protein  
113 to know if it is exposed in the surface. Probably, <sup>1197</sup>LIDLQE<sup>1202</sup> peptide is in an intrinsic  
114 disordered region of S protein.

115

### 116 *Artepillin C, anti-inflammatory compound, mimics LxxLxE motif in S protein*

117

118 In order to find small molecules with substituents that topologically and structurally resemble key  
119 amino acid side chains in LxxLxE motif, the method developed by Baran et al. (2007) has been  
120 used. This method allowed to discover a small molecule called Artepillin (ArtC) (Fig. 4A). It is a  
121 low-molecular weight phenolic single ring with two prenyl groups (3,5-diprenyl-4-  
122 hydroxycinnamic acid) (Szliszka et al., 2013). Figure 4B shows that the side chains of the two  
123 leucine and glutamic acid that constitute the key amino acid side chains are superimposed with the  
124 two prenyl groups and acid group of ArtC, respectively. ArtC is uniquely found in Brazilian

125 honeybee green propolis and is one of its major bioactive components (Marcucci et al., 2001; Park  
126 et al., 2004). In addition, it has many therapeutic effects, anti-microbial, anti-tumor, apoptosis-  
127 inductor, immunomodulatory, and anti-oxidant effects (Salomão et al., 2004; Kimoto et al., 2001;  
128 Orsolic et al., 2006; Matsuno et al., 1997; Gekker et al., 2005; Nakanishi et al., 2003). Many of  
129 these therapeutic effects can be attributed to its immunomodulatory functions (Chan et al., 2013;  
130 Cheung et al., 2011; Paulino, et al., 2008).

131  
132 *Interactions of <sup>293</sup>LDPLSE<sup>298</sup> and ArtC with B56 regulatory subunit*

133  
134 In order to determine the molecular interactions of <sup>293</sup>LDPLSE<sup>298</sup> and ArtC with B56 regulatory  
135 subunit of PP2A (PP2A-B56), molecular docking was performed with the software AutoDock vina  
136 (Trott and Olson, 2010). Figure 4C and D show that <sup>293</sup>LDPLSE<sup>298</sup> peptide is localized in the same  
137 region as pS-RepoMan peptide that contains the LxxIx $\bar{E}$  motif (PDBid: 5SW9\_B) and important  
138 amino acids of LxxIx $\bar{E}$ -like motif are superimposed with those of pS-RepoMan peptide (Fig. 4D).  
139 That is confirmed the reliability of AutoDock vina peptide docking module. In addition, Leu293  
140 of <sup>293</sup>LDPLSE<sup>298</sup> is docked into hydrophobic pocket and Glu298 form ionic interactions with amino  
141 acid residues in positive charged region of PP2A-B56 (Fig. 4C). Note that <sup>293</sup>LDPLSE<sup>298</sup> contains  
142 a serine that could be phosphorylated generating a negative charge that will interact with positive  
143 patch in B56 subunit, enhancing binding affinity (Nygren and Scott, 2015). In the case of ArtC, its  
144 two prenyl groups are docked into two pockets as already seen with <sup>293</sup>LDPLSE<sup>298</sup> peptide (Fig.  
145 4E-F). Note that the side chain of carboxylic acid group of ArtC is short to form ionic interactions  
146 with amino acid residues in positive charged region of PP2A-B56 (Fig. 4E). Therefore, to enhance  
147 binding affinity of ArtC, it is necessary to increase the length of side chain of carboxylic acid group.  
148 Interestingly, by using PinaColada, a computational method (Zaidman and Wolfson, 2016) for the  
149 design and affinity improvement of peptides that preclude protein-protein interaction, the peptide  
150 predicted (<sup>293</sup>LIDLEE<sup>298</sup>) by the software is mutated in C-terminal to negative charge residue  
151 (glutamic acid), showing the importance of the negative charge of peptide to interact with PP2A-  
152 B56. According to Autodock software, predicted binding affinity of <sup>293</sup>LDPLSE<sup>298</sup> is -4.9 Kcal/mol,  
153 and this of ArtC is -6.1 Kcal/mol. It is known that the binding affinity of SLiMs is relatively weak  
154 (low  $\mu$ molar range) (Gouw et al., 2018). This suggests that ArtC could compete with the virus to  
155 bind to PP2A-B56. To my knowledge, no compound has been identified to interact with regulatory  
156 subunits of PP2A, in addition it is the first time that a small molecule has been found that mimics

157 the LxxIxE motif. Despite of numerous studies on ArtC its target is not yet known. In this study,  
158 its target is predicted as B56-PP2A. In general, activation of PP2A appears to have a suppressive  
159 effect on the inflammatory response (Sun et al., 2017). This suggests according to anti-  
160 inflammatory effect of ArtC that it could activate, *in vivo*, B56-PP2A.

161  
162 *Protein phosphatase 2A and single RNA viruses*  
163  
164 It has been shown in single RNA viruses, Ebola virus (EBOV) and Dengue fever virus (DENV)  
165 that they recruit the host PP2A through its regulatory subunit B56-binding LxxIxE motif to activate  
166 transcription and replication (Kruse et al., 2018; Oliveira et al., 2018). In addition, it has been  
167 shown an exacerbation of lung inflammation in mice infected with rhinovirus 1B (the most  
168 common viral infectious agent in humans). Administrating Salmeterol (beta-agonist) treatment to  
169 mice exerts anti-inflammatory effects by interacting with catalytic subunit PP2A, thus increasing  
170 its activity. It is probable that beta-agonists have the potential to target distinct pro-inflammatory  
171 pathways unresponsive to corticosteroids in patients with rhinovirus-induced exacerbations  
172 (Hatchwell et al., 2014). Treatment with Salmeterol drug may merit investigation for the possibility  
173 of using it in COVID-19's patients with sustained and dangerous inflammatory reaction.

174  
175 *Summary and conclusion*  
176  
177 Analysis of SARS-CoV-2 proteome in the search of SLiMs that could be used by SARS-CoV-2 to  
178 manipulate host, allowed to discover in S protein an LxxIxE-like motif that is known to recruit the  
179 host PP2A-B56 phosphatase. Interestingly, PP2A is involved in the regulation of pro-inflammatory  
180 responses during pathogen infections. Well, recent researches have indicated that SARS-CoV-2 is  
181 involved in sustained host inflammation. Therefore, by controlling acute inflammation, it is  
182 possible to eliminate its dangerous effects on the host. LxxIxE motif of CoV-2 allowed to find a  
183 small molecule called Artepillin (ArtC), a main compound in Brazilian honeybee green propolis,  
184 which is known to have anti-inflammatory activity. ArtC, by its non-cytotoxicity in cells, high oral  
185 bioavailability, tested in mice, and cell-permeability, in addition that it can be synthesized in the  
186 laboratory (Uto et al., 2002; Yashiro et al., 2015) and produced in yeast by using synthetic biology  
187 (Munakata et al., 2019) makes it an ideal molecule for future clinical trials in COVID-19 patients.

188

## 189 **MATERIALS AND METHODS**

190

### 191 *Sequence analysis*

192

193 To search probable short linear motifs (SLiMs), SARS-CoV-2 spike protein sequence was scanned  
194 with the eukaryotic linear motif (ELM) resource (<http://elm.eu.org/>).

195 In the aim to find small molecules containing amino acids substituents that mimic LxxIxE-like  
196 motif, method described by Baran et al. (2007) was used.

197

### 198 *3D modeling and molecular docking*

199

200 3D structure of Artepillin C (ArtC) was obtained from PubChem database:  
201 <https://pubchem.ncbi.nlm.nih.gov/compound/5472440#section=3D-Conformer>.

202 For docking, the coordinates of the <sup>293</sup>LDPLSE<sup>298</sup> peptide were extracted from spike S protein of  
203 CoV-2 structure (PDBid: 6VSB\_A). Unfortunately, the region containing <sup>1197</sup>LIDLQE<sup>1202</sup> peptide  
204 has not been resolved in all known 3D structures of spike S protein. So, Pep-Fold (Thevenet et al.,  
205 2012) software was used to model *de novo* this peptide. The model quality of the peptide was  
206 assessed by analysis of a Ramachandran plot through PROCHECK (Vaguine et al., 1999).

207 The docking of the two peptides into B56 regulatory subunit of PPA2 (PDBid: 5SWF\_A) was  
208 performed with the software AutoDock vina (Trott and Olson, 2010). The 3D complex containing  
209 B56 subunit and peptides was refined by using FlexPepDock (London et al., 2011), which allows  
210 full flexibility to the peptide and side-chain flexibility to the receptor. The electrostatic potential  
211 surface of the B56 subunit was realized with PyMOL software (<http://pymol.org/>).

212 PinaColada a computational method (Zaidman and Wolfson, 2016) for inhibitory peptide design  
213 was used to improve affinity of <sup>293</sup>LDPLSE<sup>298</sup> peptide to bind to B56 regulatory subunit of PPA2.  
214 The software mutates several times the input peptide in the aim to find the highest binding affinity.

215

### 216 *Phylogeny*

217

218 To establish the phylogenetic relationships between spike S protein of SARS-CoV-2 and  
219 representative betacoronaviruses, amino acid residues sequences were aligned with Clustal omega  
220 (Sievers et al., 2011) and a phylogenetic tree was constructed with MrBayes (Huelsenbeck and  
221 Ronquist, 2001) using: Likelihood model (Number of substitution types: 6(GTR); Substitution

222 model: Poisson; Rates variation across sites: Invariable + gamma); Markov Chain Monte Carlo  
223 parameters ( Number of generations: 100 000; Sample a tree every: 1000 generations) and Discard  
224 first 500 trees sampled (burnin).

225

## 226 **ACKNOWLEDGMENTS**

227 I would like to thank the IBIS bioinformatics group for their help. I am grateful to Dr. Ahmad  
228 Abdel-Mawgoud SALEH, Université Laval, for the revision of the manuscript.

229

## 230 **CONFLICT OF INTERESTED**

231 The author declares that he has no conflicts of interest.

232

## 233 **REFERENCES**

234

235 Baran, I., Varekova, R. S., Parthasarathi, L., Suchomel, S., Casey, F., & Shields, D. C. (2007).  
236 Identification of potential small molecule peptidomimetics similar to motifs in proteins. *J Chem*  
237 *Inf Model*, 47(2), 464-474. doi:10.1021/ci600404q

238 Chan, G. C., Cheung, K. W., & Sze, D. M. (2013). The immunomodulatory and anticancer  
239 properties of propolis. *Clin Rev Allergy Immunol*, 44(3), 262-273. doi:10.1007/s12016-012-8322-  
240 2

241 Cheung, K. W., Sze, D. M., Chan, W. K., Deng, R. X., Tu, W., & Chan, G. C. (2011). Brazilian  
242 green propolis and its constituent, Artepillin C inhibits allogeneic activated human CD4 T cells  
243 expansion and activation. *J Ethnopharmacol*, 138(2), 463-471. doi:10.1016/j.jep.2011.09.031

244 Davey, N. E., Cyert, M. S., & Moses, A. M. (2015). Short linear motifs - ex nihilo evolution of  
245 protein regulation. *Cell Commun. Signal.*, 13, 43. doi:10.1186/s12964-015-0120-z

246 Davey, N. E., Travé, G., & Gibson, T. J. (2011). How viruses hijack cell regulation. *Trends*  
247 *Biochem. Sci.*, 36(3), 159-169. doi:10.1016/j.tibs.2010.10.002

248 Davey, N. E., Van Roey, K., Weatheritt, R. J., Toedt, G., Uyar, B., Altenberg, B., . . . Gibson, T.  
249 J. (2012). Attributes of short linear motifs. *Mol. Biosyst.*, 8(1), 268-281. doi:10.1039/c1mb05231d

250 de Wit, E., van Doremalen, N., Falzarano, D., & Munster, V. J. (2016). SARS and MERS: recent  
251 insights into emerging coronaviruses. *Nat. Rev. Microbiol.*, 14(8), 523-534.  
252 doi:10.1038/nrmicro.2016.81

253 Eichhorn, P. J. A., Creighton, M. P., & Bernards, R. (2009). Protein phosphatase 2A regulatory  
254 subunits and cancer. *Biochim. Biophys. Acta*, 1795(1), 1-15. doi:10.1016/j.bbcan.2008.05.005



- 255 Gekker, G., Hu, S., Spivak, M., Lokensgard, J. R., & Peterson, P. K. (2005). Anti-HIV-1 activity  
256 of propolis in CD4(+) lymphocyte and microglial cell cultures. *J Ethnopharmacol*, *102*(2), 158-  
257 163. doi:10.1016/j.jep.2005.05.045
- 258 Gouw, M., Michael, S., Sámano-Sánchez, H., Kumar, M., Zeke, A., Lang, B., . . . Gibson, T. J.  
259 (2018). The eukaryotic linear motif resource - 2018 update. *Nucleic Acids Res.*, *46*(D1), D428-  
260 D434. doi:10.1093/nar/gkx1077
- 261 Graham, R. L., & Baric, R. S. (2010). Recombination, reservoirs, and the modular spike:  
262 mechanisms of coronavirus cross-species transmission. *J. Virol.*, *84*(7), 3134-3146.  
263 doi:10.1128/JVI.01394-09
- 264 Guernon, J., Godet, A. N., Galioot, A., Falanga, P. B., Colle, J.-H., Cayla, X., & Garcia, A. (2011).  
265 PP2A targeting by viral proteins: a widespread biological strategy from DNA/RNA tumor viruses  
266 to HIV-1. *Biochim. Biophys. Acta*, *1812*(11), 1498-1507. doi:10.1016/j.bbadis.2011.07.001
- 267 Hatchwell, L., Girkin, J., Dun, M. D., Morten, M., Verrills, N., Toop, H. D., . . . Mattes, J. (2014).  
268 Salmeterol attenuates chemotactic responses in rhinovirus-induced exacerbation of allergic airways  
269 disease by modulating protein phosphatase 2A. *J. Allergy Clin. Immunol.*, *133*(6), 1720-1727.  
270 doi:10.1016/j.jaci.2013.11.014
- 271 Huelsenbeck, J. P., & Ronquist, F. (2001). MRBAYES: Bayesian inference of phylogenetic  
272 trees. *Bioinformatics*, *17*(8), 754-755. doi:10.1093/bioinformatics/17.8.754
- 273 Kimoto, T., Aga, M., Hino, K., Koya-Miyata, S., Yamamoto, Y., Micallef, M. J., . . . Kurimoto,  
274 M. (2001). Apoptosis of human leukemia cells induced by Artepillin C, an active ingredient of  
275 Brazilian propolis. *Anticancer Res*, *21*(1A), 221-228.
- 276 Konishi, Y. (2005). Transepithelial transport of artepillin C in intestinal Caco-2 cell  
277 monolayers. *Biochim Biophys Acta*, *1713*(2), 138-144. doi:10.1016/j.bbamem.2005.05.011
- 278 Konishi, Y., Hitomi, Y., Yoshida, M., & Yoshioka, E. (2005a). Absorption and bioavailability of  
279 artepillin C in rats after oral administration. *J Agric Food Chem*, *53*(26), 9928-9933.  
280 doi:10.1021/jf051962y
- 281 Kozicky, L. K., & Sly, L. M. (2015). Phosphatase regulation of macrophage activation. *Semin*  
282 *Immunol*, *27*(4), 276-285. doi:10.1016/j.smim.2015.07.001
- 283 Kruse, T., Biedenkopf, N., Hertz, E. P. T., Dietzel, E., Stalman, G., López-Méndez, B., . . . Becker,  
284 S. (2018). The Ebola Virus Nucleoprotein Recruits the Host PP2A-B56 Phosphatase to Activate  
285 Transcriptional Support Activity of VP30. *Mol. Cell*, *69*(1), 136-145.e136.  
286 doi:10.1016/j.molcel.2017.11.034
- 287 Li, F. (2012). Evidence for a common evolutionary origin of coronavirus spike protein receptor-  
288 binding subunits. *J. Virol.*, *86*(5), 2856-2858. doi:10.1128/JVI.06882-11
- 289 Li, F. (2013). Receptor recognition and cross-species infections of SARS coronavirus. *Antiviral*  
290 *Res.*, *100*(1), 246-254. doi:10.1016/j.antiviral.2013.08.014

- 291 Li, F. (2015). Receptor recognition mechanisms of coronaviruses: a decade of structural studies. *J.*  
292 *Virol.*, 89(4), 1954-1964. doi:10.1128/JVI.02615-14
- 293 Li, F. (2016). Structure, Function, and Evolution of Coronavirus Spike Proteins. *Annu Rev Virol*,  
294 3(1), 237-261. doi:10.1146/annurev-virology-110615-042301
- 295 London, N., Raveh, B., Cohen, E., Fathi, G., & Schueler-Furman, O. (2011). Rosetta FlexPepDock  
296 web server--high resolution modeling of peptide-protein interactions. *Nucleic Acids Res.*, 39(Web  
297 Server issue), W249-253. doi:10.1093/nar/gkr431
- 298 Marcucci, M. C., Ferreres, F., García-Viguera, C., Bankova, V. S., De Castro, S. L., Dantas, A. P.,  
299 . . . Paulino, N. (2001). Phenolic compounds from Brazilian propolis with pharmacological  
300 activities. *J Ethnopharmacol*, 74(2), 105-112. doi:10.1016/s0378-8741(00)00326-3
- 301 Masters, P. S. (2006). The molecular biology of coronaviruses. *Adv. Virus Res.*, 66, 193-292.  
302 doi:10.1016/S0065-3527(06)66005-3
- 303 Matsuno, T., Jung, S. K., Matsumoto, Y., Saito, M., & Morikawa, J. (1997). Preferential  
304 cytotoxicity to tumor cells of 3,5-diprenyl-4-hydroxycinnamic acid (artepillin C) isolated from  
305 propolis. *Anticancer Res*, 17(5A), 3565-3568.
- 306 Munakata, R., Takemura, T., Tatsumi, K., Moriyoshi, E., Yanagihara, K., Sugiyama, A., . . .  
307 Yazaki, K. (2019). Isolation of. *Commun Biol*, 2, 384. doi:10.1038/s42003-019-0630-0
- 308 Nakanishi, I., Uto, Y., Ohkubo, K., Miyazaki, K., Yakumar, H., Urano, S., . . . Ikota, N. (2003).  
309 Efficient radical scavenging ability of artemillin C, a major component of Brazilian propolis, and  
310 the mechanism. *Org Biomol Chem*, 1(9), 1452-1454. doi:10.1039/b302098c
- 311 Nygren, P. J., & Scott, J. D. (2015). Therapeutic strategies for anchored kinases and phosphatases:  
312 exploiting short linear motifs and intrinsic disorder. *Front. Pharmacol.*, 6, 158.  
313 doi:10.3389/fphar.2015.00158
- 314 Oliveira, M., Lert-Itthiporn, W., Cavadas, B., Fernandes, V., Chuansumrit, A., Anunciação, O., . .  
315 . Sakuntabhai, A. (2018). Joint ancestry and association test indicate two distinct pathogenic  
316 pathways involved in classical dengue fever and dengue shock syndrome. *PLoS Negl. Trop. Dis.*,  
317 12(2), e0006202. doi:10.1371/journal.pntd.0006202
- 318 Orsolić, N., Saranović, A. B., & Basić, I. (2006). Direct and indirect mechanism(s) of antitumour  
319 activity of propolis and its polyphenolic compounds. *Planta Med*, 72(1), 20-27. doi:10.1055/s-  
320 2005-873167
- 321 Park, Y. K., Paredes-Guzman, J. F., Aguiar, C. L., Alencar, S. M., & Fujiwara, F. Y. (2004).  
322 Chemical constituents in *Baccharis dracunculifolia* as the main botanical origin of southeastern  
323 Brazilian propolis. *J Agric Food Chem*, 52(5), 1100-1103. doi:10.1021/jf021060m
- 324 Paulino, N., Abreu, S. R., Uto, Y., Koyama, D., Nagasawa, H., Hori, H., . . . Bretz, W. A. (2008).  
325 Anti-inflammatory effects of a bioavailable compound, Artemillin C, in Brazilian propolis. *Eur J*  
326 *Pharmacol*, 587(1-3), 296-301. doi:10.1016/j.ejphar.2008.02.067

- 327 Peiris, J. S. M., Lai, S. T., Poon, L. L. M., Guan, Y., Yam, L. Y. C., Lim, W., . . . group, S. s.  
328 (2003). Coronavirus as a possible cause of severe acute respiratory syndrome. *Lancet*, *361*(9366),  
329 1319-1325. doi:10.1016/s0140-6736(03)13077-2
- 330 Salomão, K., Dantas, A. P., Borba, C. M., Campos, L. C., Machado, D. G., Aquino Neto, F. R., &  
331 de Castro, S. L. (2004). Chemical composition and microbicidal activity of extracts from Brazilian  
332 and Bulgarian propolis. *Lett Appl Microbiol*, *38*(2), 87-92. doi:10.1111/j.1472-765x.2003.01458.x
- 333 Shanley, T. P., Vasi, N., Denenberg, A., & Wong, H. R. (2001a). The serine/threonine phosphatase,  
334 PP2A: endogenous regulator of inflammatory cell signaling. *J Immunol*, *166*(2), 966-972.  
335 doi:10.4049/jimmunol.166.2.966
- 336 Shimizu, K., Ashida, H., Matsuura, Y., & Kanazawa, K. (2004). Antioxidative bioavailability of  
337 artemillin C in Brazilian propolis. *Arch Biochem Biophys*, *424*(2), 181-188.  
338 doi:10.1016/j.abb.2004.02.021
- 339 Sievers, F., Wilm, A., Dineen, D., Gibson, T. J., Karplus, K., Li, W., . . . Higgins, D. G. (2011).  
340 Fast, scalable generation of high-quality protein multiple sequence alignments using Clustal  
341 Omega. *Mol. Syst. Biol.*, *7*, 539. doi:10.1038/msb.2011.75
- 342 Sun, L., Pham, T. T., Cornell, T. T., McDonough, K. L., McHugh, W. M., Blatt, N. B., . . . Shanley,  
343 T. P. (2017a). Myeloid-Specific Gene Deletion of Protein Phosphatase 2A Magnifies MyD88- and  
344 TRIF-Dependent Inflammation following Endotoxin Challenge. *J Immunol*, *198*(1), 404-416.  
345 doi:10.4049/jimmunol.1600221
- 346 Szliszka, E., Mertas, A., Czuba, Z. P., & Król, W. (2013). Inhibition of Inflammatory Response by  
347 Artemillin C in Activated RAW264.7 Macrophages. *Evid Based Complement Alternat Med*, *2013*,  
348 735176. doi:10.1155/2013/735176
- 349 Thévenet, P., Shen, Y., Maupetit, J., Guyon, F., Derreumaux, P., & Tufféry, P. (2012). PEP-FOLD:  
350 an updated de novo structure prediction server for both linear and disulfide bonded cyclic  
351 peptides. *Nucleic Acids Res.*, *40*(Web Server issue), W288-293. doi:10.1093/nar/gks419
- 352 Trott, O., & Olson, A. J. (2010). AutoDock Vina: improving the speed and accuracy of docking  
353 with a new scoring function, efficient optimization, and multithreading. *J. Comput. Chem.*, *31*(2),  
354 455-461. doi:10.1002/jcc.21334
- 355 Uto, Y., Hirata, A., Fujita, T., Takubo, S., Nagasawa, H., & Hori, H. (2002). First total synthesis  
356 of artemillin C established by o,o'-diprenylation of p-halophenols in water. *J Org Chem*, *67*(7),  
357 2355-2357. doi:10.1021/jo0056904
- 358 Vaguine, A. A., Richelle, J., & Wodak, S. J. (1999). SFCHECK: a unified set of procedures for  
359 evaluating the quality of macromolecular structure-factor data and their agreement with the atomic  
360 model. *Acta Crystallogr. D Biol. Crystallogr.*, *55*(Pt 1), 191-205.  
361 doi:10.1107/S09074444998006684

362 Van Roey, K., Uyar, B., Weatheritt, R. J., Dinkel, H., Seiler, M., Budd, A., . . . Davey, N. E. (2014).  
363 Short linear motifs: ubiquitous and functionally diverse protein interaction modules directing cell  
364 regulation. *Chem. Rev.*, *114*(13), 6733-6778. doi:10.1021/cr400585q

365 Via, A., Uyar, B., Brun, C., & Zanzoni, A. (2015). How pathogens use linear motifs to perturb host  
366 cell networks. *Trends Biochem. Sci.*, *40*(1), 36-48. doi:10.1016/j.tibs.2014.11.001

367 Yashiro, K., Hanaya, K., Shoji, M., & Sugai, T. (2015). New synthesis of artepillin C, a prenylated  
368 phenol, utilizing lipase-catalyzed regioselective deacetylation as the key step. *Biosci Biotechnol*  
369 *Biochem*, *79*(12), 1926-1930. doi:10.1080/09168451.2015.1058704

370 Zaidman, D., & Wolfson, H. J. (2016). PinaColada: peptide-inhibitor ant colony ad-hoc design  
371 algorithm. *Bioinformatics*, *32*(15), 2289-2296. doi:10.1093/bioinformatics/btw133

372

373

## 374 **FIGURES LEGEND**

375

376 **Figure 1.** Multiple alignment of the spike glycoprotein of betacoronaviruses using Clustal omega.  
377 <sup>293</sup>LDPLSE<sup>298</sup> (A) and <sup>1197</sup>LIDLQE<sup>120</sup> (B) motifs are indicated by green stars. GenBank and  
378 UniProt accession numbers are indicated at the start of each sequence. The figure was prepared  
379 with ESPript (<http://esprict.ibcp.fr>).

380

381 **Figure 2.** Unrooted phylogenetic tree of spike protein of representative betacoronaviruses. The tree  
382 was constructed using Mr Bayes method based on the multiple sequence alignment by Clustal  
383 omega. Red rectangle assembles betacoronaviruses with the same <sup>1197</sup>LIDLQE<sup>1202</sup>. Green star  
384 indicated the only betacoronavirus with <sup>293</sup>LDPLSE<sup>298</sup>. GenBank and UniProt accession numbers  
385 are indicated at the start of each sequence.

386

387 **Figure 3.** Spike (S) protein of SARS-CoV-2. (A) Diagram representation of S protein colored by  
388 domain. N-terminal domain (NTD), receptor-binding domain (RBD), subdomains 1 and 2 (SD1-  
389 2, orange), S1/S2 protease cleavage site, Fusion peptide (FP), heptad repeat 1 and 2 (HR1 and  
390 HR2), central helix (CH), connector domain (CD), transmembrane domain (TM), cytoplasmic tail  
391 (CT), and the localization of <sup>293</sup>LDPLSE<sup>298</sup> in the end of NTD and <sup>1197</sup>LIDLQE<sup>1202</sup> peptide in  
392 HR2. (B) Surface structure representation of the S1 subunit (PDBid: 6VSB\_A). <sup>293</sup>LDPLSE<sup>298</sup>  
393 peptide is localized in the surface S1 subunit (red).

394  
395 **Figure 4.** Stick representation of **(A)** Artepillin C (ArtC) and **(B)** superposition of ArtC (yellow)  
396 and <sup>293</sup>LDPLSE<sup>298</sup> peptide (green). Electrostatic potential surface representation of the region of  
397 the B56 regulatory subunit of PP2A (PDBid: 5SWF\_A) with docked **(C)** <sup>293</sup>LDPLSE<sup>298</sup> peptide  
398 (green), **(D)** <sup>293</sup>LDPLSE<sup>298</sup> superimposed to pS-RepoMan (orange)  
399 (<sup>581</sup>RDIASKKPLL**p**SPIPELPEVPE<sup>601</sup>) peptide (PDBid: 5SW9\_B), **(E)** ArtC (yellow) and **(F)** ArtC  
400 superimposed to <sup>293</sup>LDPLSE<sup>298</sup> peptide (green). The surfaces are colored by electrostatic potential  
401 with negative charge shown in red and positive charge in blue. Images were generated using PyMol  
402 ([www.pymol.org](http://www.pymol.org)).  
403

404

**A**

|                                                  |          |        |       |         |        |         |
|--------------------------------------------------|----------|--------|-------|---------|--------|---------|
|                                                  | 270      | 280    | 290   | 300     | 310    | 320     |
| YP_009724390.1_Human_SARS-CoV-2_Wuhan-Hu-1_China | VGYIQPR  | TFLLKY | NENCT | ITDAVDC | ALDPL  | SETKCT  |
| P59594.1_Human_SARS-Cov_HongKong_China           | VGYLKPT  | TFMLKY | DENCT | ITDAVDC | SQNP   | LAEKCS  |
| ATO98205.1_Bat_SARS-like_coronavirus_China       | VGYLKPA  | TFMLKY | DENCT | ITDAVDC | SQNP   | LAEKCS  |
| APO40579.1_Bat_SARS-like_coronavirus_Kenya       | VGHLLKPL | TMLAEF | DENCT | ITDAVDC | SQDP   | LSEIKCT |
| P36334_Human_SPIKE_CVHOC_coronavirus_OC43        | VTFLLTSR | QYLLAF | NQDCI | IFNAED  | CMSDF  | MSEIKCK |
| P25190_Bovine_SPIKE_CVBF_coronavirus_strain_F15  | VTFLLTSR | QYLLAF | NQDCI | IFNAED  | CMSDF  | MSEIKCK |
| P11225_Murine_SPIKE_CVMJH_coronavirus_JHM        | VTFLLTSR | QYLLAF | NQDCI | IFNAED  | CMSDF  | MSEIKCK |
| ALK80251.1_Human_MERS-CoV_South-Korea            | VYKLLQPL | TFLLDF | SVDGY | IRRAID  | CGFND  | LSQLHCS |
| A3EX94_Bat_SPIKE_BCHK4_coronavirus_HKU4          | VYKLLHQL | TYLLDF | SVDGY | IRRAID  | CGHDD  | LSQLHCS |
| QGA70702.1_Erinaceus_coronavirus_HKU31_China     | TYQLHKL  | NYLVEF | DVGCY | IVRASD  | CGANDY | TQLCS   |

405

406

**B**

|                                                  |        |       |       |        |      |        |
|--------------------------------------------------|--------|-------|-------|--------|------|--------|
|                                                  | 1190   | 1200  | 1210  | 1220   | 1230 | 1240   |
| YP_009724390.1_Human_SARS-CoV-2_Wuhan-Hu-1_China | NEVAKN | LNESL | IDLQ  | ELGK   | YEQY | IKWPWY |
| P59594.1_Human_SARS-Cov_HongKong_China           | NEVAKN | LNESL | IDLQ  | ELGK   | YEQY | IKWPWY |
| ATO98205.1_Bat_SARS-like_coronavirus_China       | NEVAKN | LNESL | IDLQ  | ELGK   | YEQY | IKWPWY |
| APO40579.1_Bat_SARS-like_coronavirus_Kenya       | NEIAKN | LNESL | IDLQ  | ELGK   | YEQY | IKWPWY |
| P36334_Human_SPIKE_CVHOC_coronavirus_OC43        | QEAIKV | LNQSY | INLKD | IGTYE  | YV   | KWPWY  |
| P25190_Bovine_SPIKE_CVBF_coronavirus_strain_F15  | QEAIKV | LNQSY | INLKD | IGTYE  | YV   | KWPWY  |
| P11225_Murine_SPIKE_CVMJH_coronavirus_JHM        | QDAIKK | LNQSY | INLKE | VGTYE  | MY   | VKWPWY |
| ALK80251.1_Human_MERS-CoV_South-Korea            | QQVVK  | LNDSY | IDLKE | LGNYT  | YV   | NKWPWY |
| A3EX94_Bat_SPIKE_BCHK4_coronavirus_HKU4          | QEVVK  | LNDSY | IDLKE | LGNYT  | YV   | NKWPWY |
| QGA70702.1_Erinaceus_coronavirus_HKU31_China     | QSVVEA | LNQSY | IELK  | ELGNYT | YV   | NKWPWY |

407

408 **Fig. 1**

409

410

411

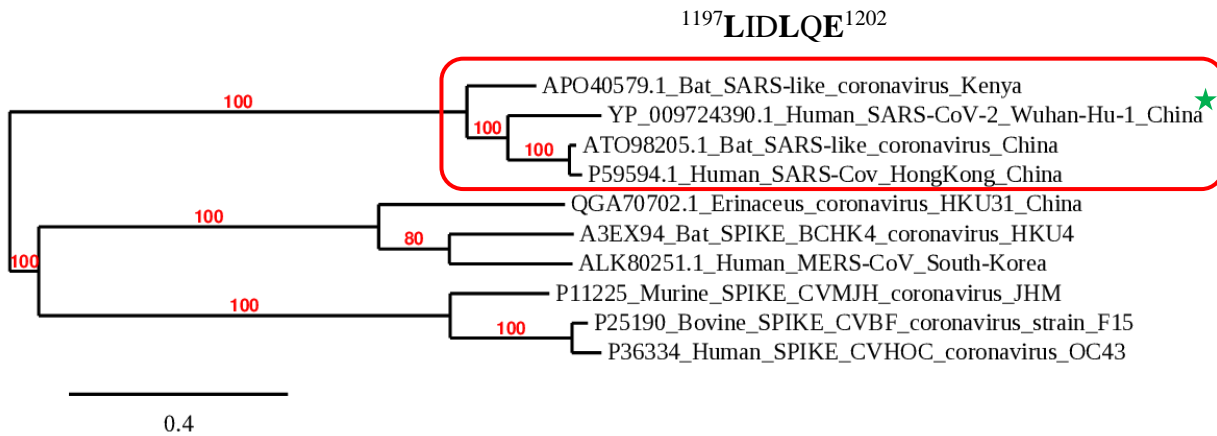

412

413 **Fig. 2**

414

415

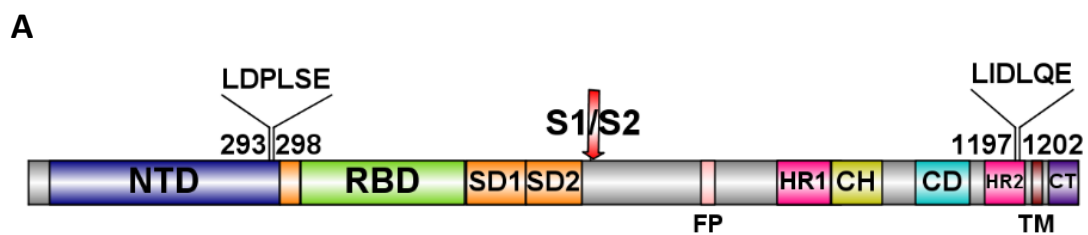

416

417

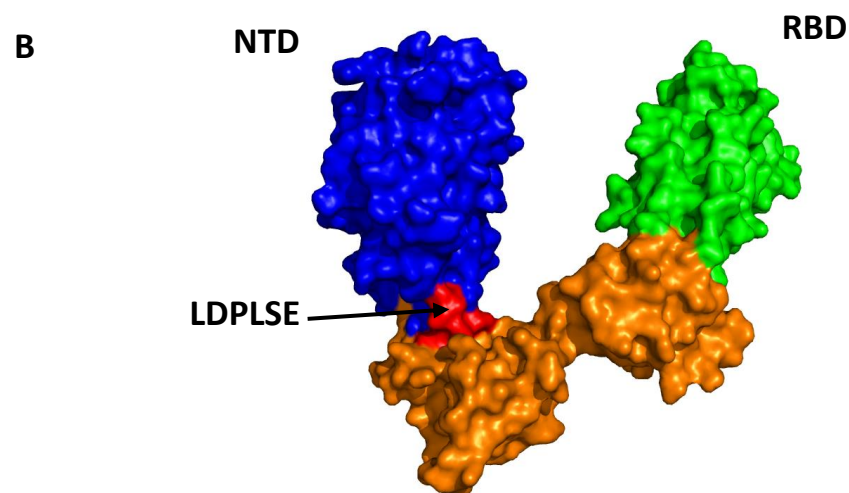

418

419 **Fig. 3**

420

421

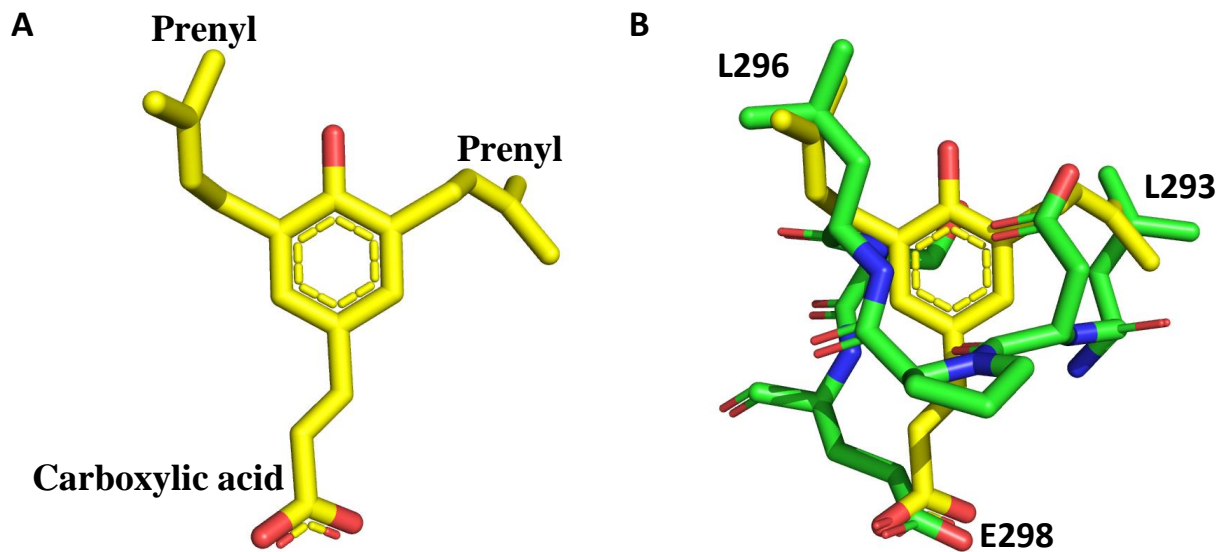

422

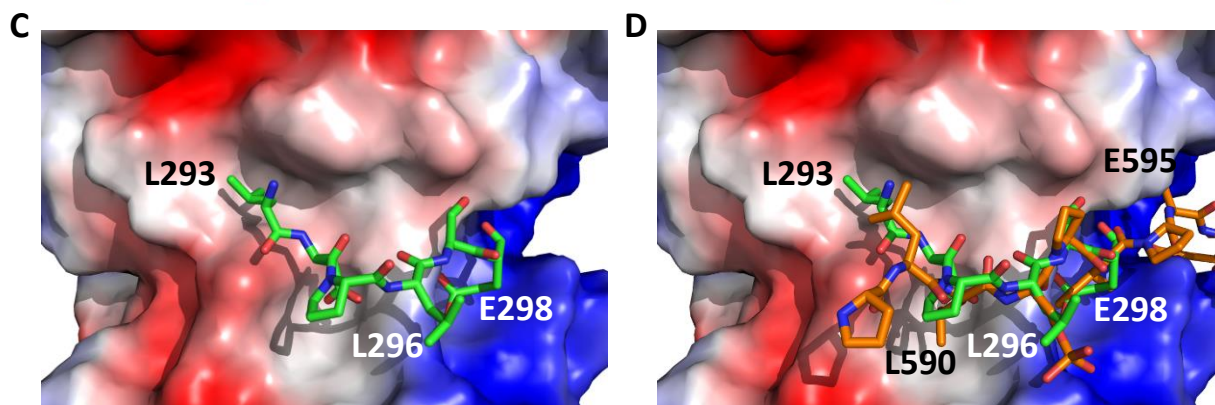

423

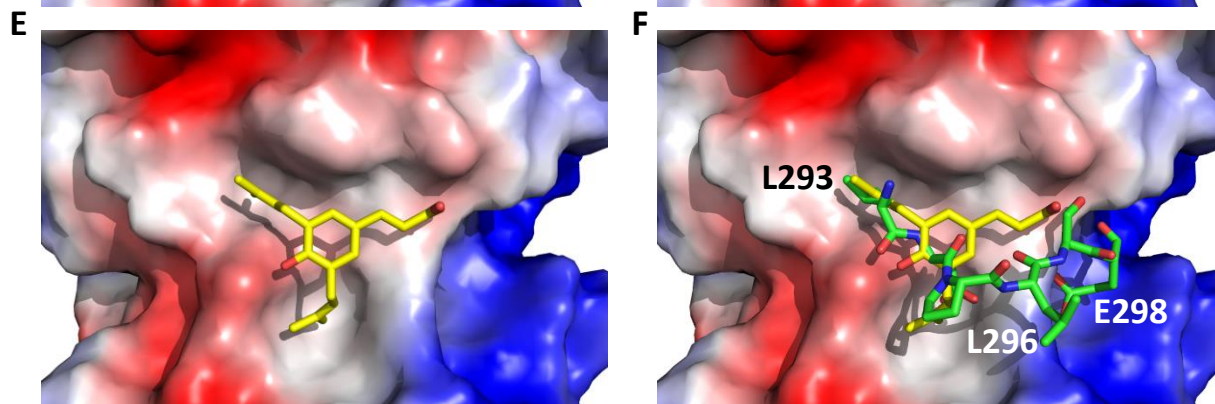

424

425

426 **Fig. 4**

427
